# Supplementary material for: Integration of molecular network data reconstructs Gene Ontology
Source: PubMed Central journal article supplement — Bioinformatics. 2014 Aug 22;30(17):i594–600. doi: 10.1093/bioinformatics/btu470 (PMC4230235; doi:10.1093/bioinformatics/btu470), 2014-08-22
Supplement: supp_btu470_H_179_Supplementary_File.pdf [file supp_btu470_H_179_Supplementary_File.pdf]

# Supplementary Figures

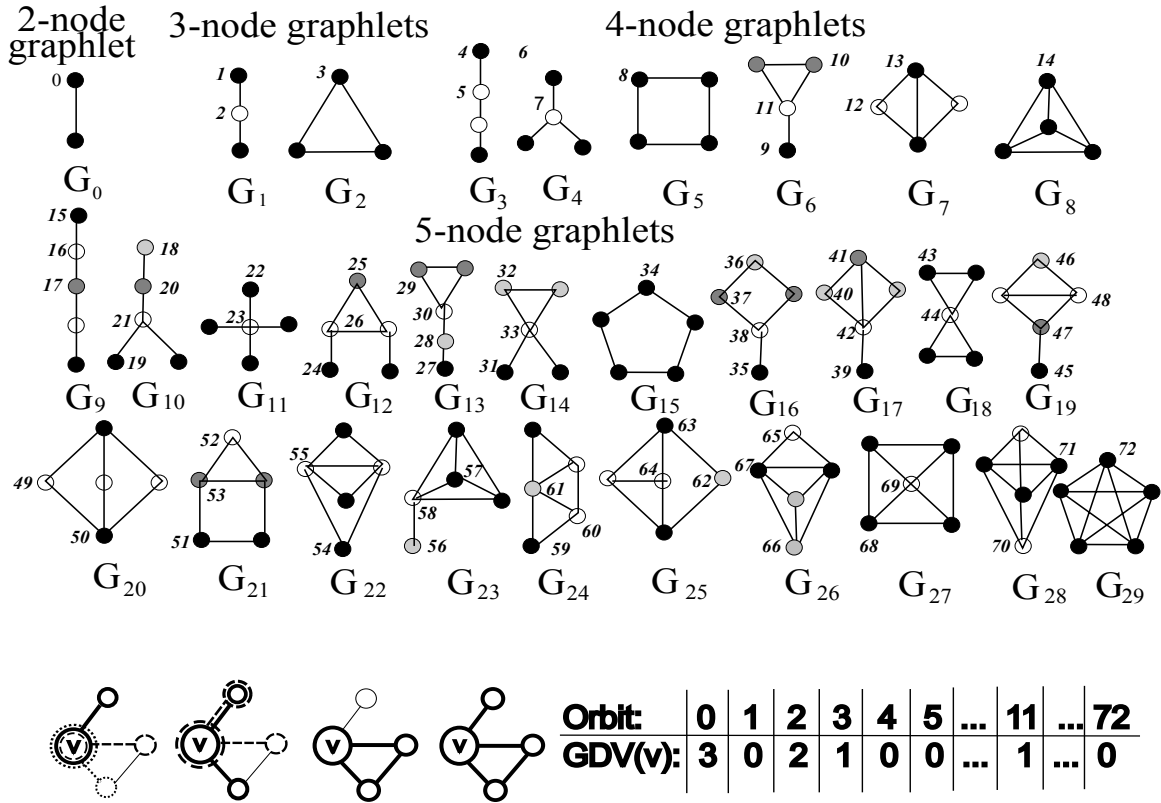

Figure 1: **Above:** Graphlets with 2 to 5 nodes denoted by  $G_0, G_1, G_2, \dots, G_{29}$  and their automorphism orbits  $i \in 0, 1, 2, \dots, 72$ . Nodes within a graphlet belonging to the same orbit (i.e. invariant under the "symmetry group") are represented by the same shade. **Below:** An illustration of a GDV vector of a node  $v$ . Node touches  $G_0$  graphlet, orbit 0 three times (first panel), middle node of a graphlet  $G_1$ , orbit 2, two times (second panel), a graphlet  $G_2$  (third panel), a middle node of a graphlet  $G_6$ , orbit 11, (fourth panel) and no other orbits.

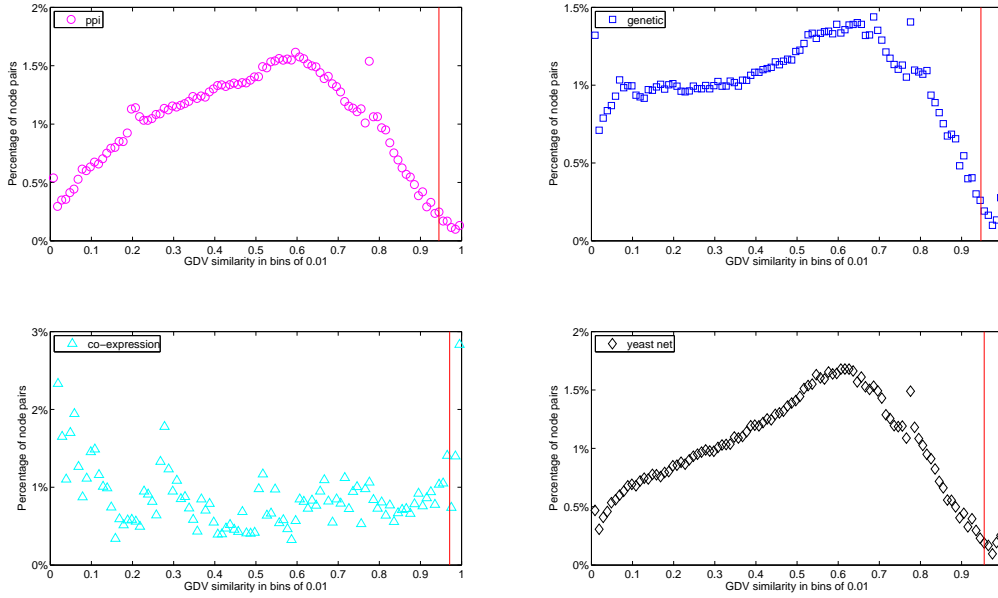

Figure 2: **GDV similarity distributions**: Distribution of gene pairs according to their GDV similarity in four different networks of *Saccharomyces cerevisiae*: (A) protein-protein interaction (PPI) network; (B) genetic interaction (GI) network; (C) gene co-expression network; (D) integrated function network (YeastNet). Vertical red line represents a threshold for a given distribution obtained by selecting top 1% of the most similar gene pairs (corresponding to a  $p$ -value of 0.01).

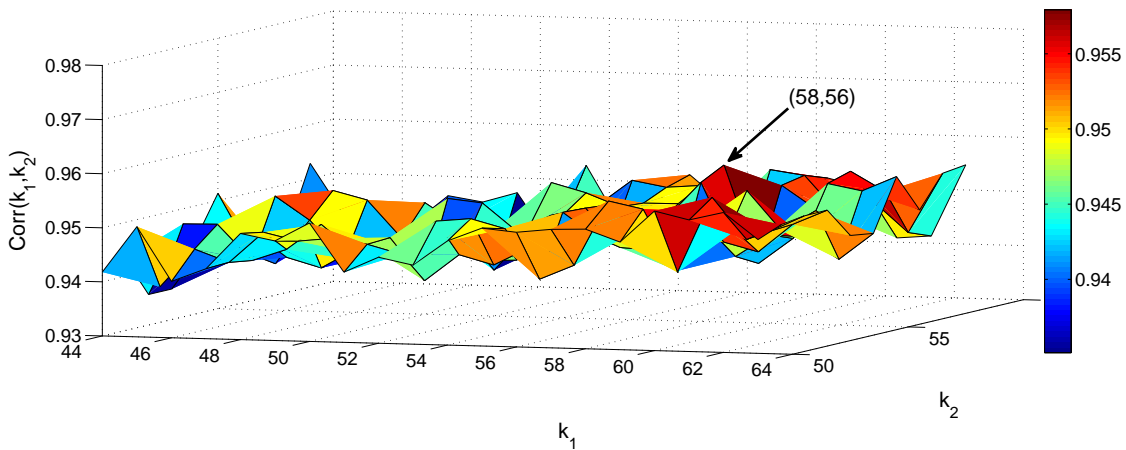

Figure 3: **Estimation of rank parameters by computing cophenetic correlation coefficient**: For each pair  $(k_1^{(i)}, k_2^{(j)})$  of ranks, depicted in the  $(x, y)$  plane we compute averaged cophenetic correlation coefficient for two data sets - *genes* and *GO terms*. Averaged coefficient is represented on the  $z$  axis. We identified a set of parameters  $(k_1, k_2) = (58, 56)$ , as our optimal ranks, for which there is a maximum value of cophenetic correlation coefficient (a peak on this 3D color plot). Around this value, correlation coefficient significantly drops.

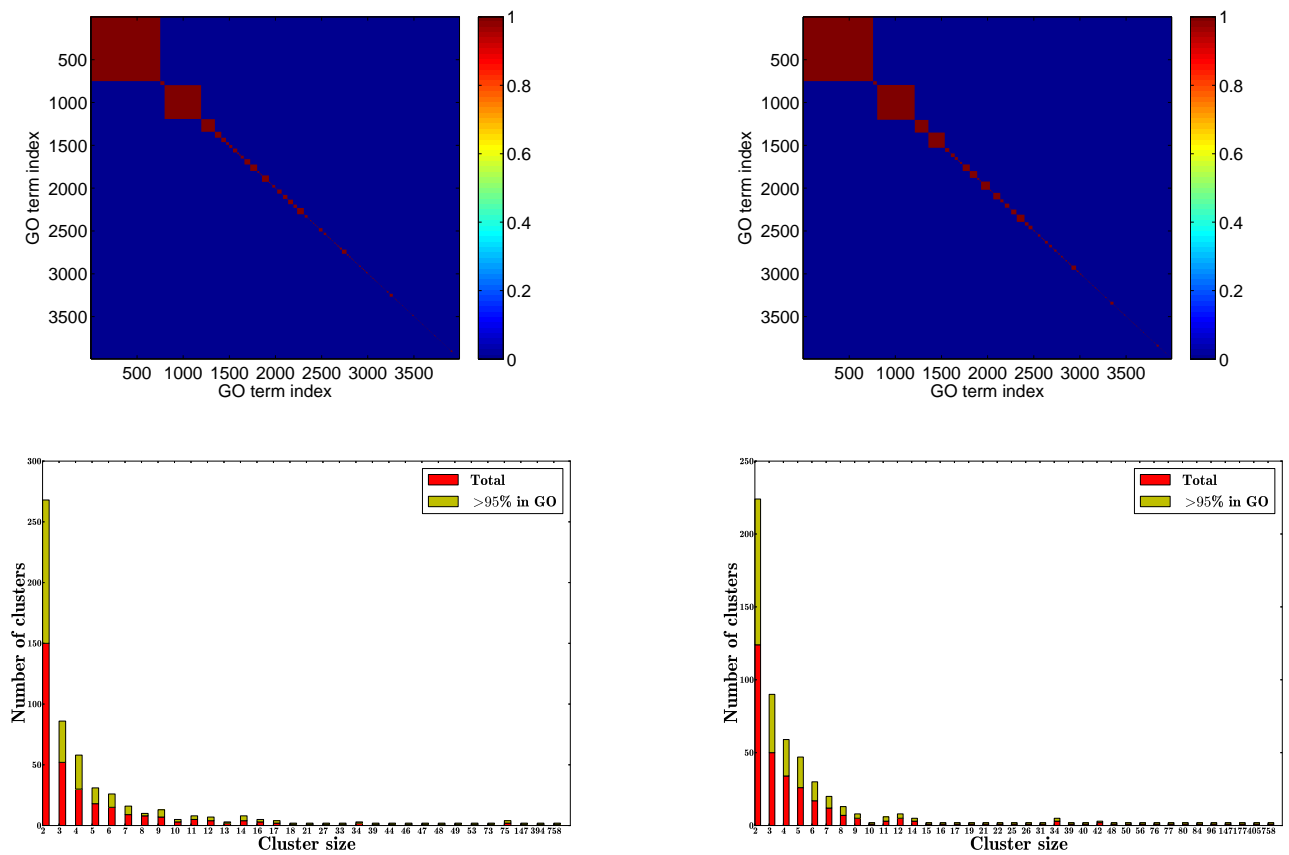

Figure 4: **Top panels:** Block diagonal form of consensus matrix obtained by running the algorithm only on network data (**left**) and on network data including GDV similarity constraints (**right**). Each consensus matrix is computed by averaging different connectivity matrices obtained by repeating the factorization process for 20 different random initial conditions. Highly reliable term-term associations are denoted within blocks of a matrix. **Bottom panels:** Distribution of cluster sizes for network data (**left**) and network + GDV similarity constraints (**right**). Number of clusters with a given size is represented with red bars while the number of clusters of the same size containing more than 90% of terms directly connected in GO is represented with yellow bars.
